# Supplementary material for: Bevacizumab Targeting Diffuse Intrinsic Pontine Glioma: Results of 89Zr-Bevacizumab PET Imaging in Brain Tumor Models
Source: Oxford University Press journal article supplement (doi:10.1158/1535-7163.mct-15-0558), 2016-06-21
Supplement: 15357163mct150558-sup-152149_1_supp_3488116_x6z9c9.docx [file 15357163mct150558-sup-152149_1_supp_3488116_x6z9c9.docx]

Supplemental Figure 1: A heatmap generated using K-means clustering of expression of VEGF-A associated genes; LG-BSG samples (blue) in the disease type histology (upper legends) cluster with normal brain (purple). DIPG (red) clusters with GBM (green). DIPG (green), pHGG/GBM (red).

Supplemental Figure 2: VEGF mRNA expression in DIPG in comparison to normal brain (n=31) as analyzed by R2 (R2.amc.nl), clustered by stage of disease; unknown (n=10), pretreatment (n=2) and postmortem (n=23)
